# Supplementary material for: Gut Microbiota Mediates Oolong Tea Polyphenols Alleviation of Circadian Rhythm Disturbance
Source: Research Square preprint supplement (doi:10.21203/rs.3.rs-769896/v1), 2021-08-10
Supplement: Supplementary file 1 [file 714383470e13ec56330c160e.xlsx]

## Sheet: Sheet1
Components	Content (mg/g)
GC	22.32 ± 0.83
EGC	58.63 ± 3.72
EGCG	593.54 ± 24.84
EC	26.77 ± 2.23
GCG	43.89 ± 3.41
EGCG3''Me	79.63 ± 5.45
ECG	127.69 ± 8.32
